# Supplementary material for: Randomized Clinical Trial to Evaluate an Atrial Fibrillation Stroke Prevention Shared Decision‐Making Pathway
Source: PubMed Central journal article supplement — J Am Heart Assoc. 2023 Feb 3;12(3):e028562. doi: 10.1161/JAHA.122.028562 (PMC9973612; doi:10.1161/jaha.122.028562), 2023-02-03
Supplement: JAH3-12-e028562-s001.pdf [file JAH3-12-e028562-s001.pdf]

# **Supplemental Material**

Table S1. Clinical outcomes and Adverse Events (AEs)

|                                                 | <b>Usual Care<br/>(N=506)</b> | <b>Tool<br/>Intervention<br/>(N=495)</b> | <b>P-value</b> |
|-------------------------------------------------|-------------------------------|------------------------------------------|----------------|
| Patients with at least 1 clinical outcome n (%) | 13 (2.6%)                     | 21 (4.2%)                                | 0.16           |
| Number of clinical outcome events, n            | 18*                           | 22 <sup>†</sup>                          |                |
| Major bleeding events, n                        | 6                             | 1                                        |                |
| Transient ischemic attack, n                    | 0                             | 1                                        |                |
| Myocardial infarction, n                        | 0                             | 0                                        |                |
| Pulmonary embolus, n                            | 0                             | 0                                        |                |
| Deep vein thrombosis, n                         | 0                             | 0                                        |                |

\* One patient in UC arm had 4 incidences of major bleeding and 1 incidence of minor bleeding

<sup>†</sup> One patient in SDM arm had 2 incidences of minor bleeding

Table S2. Clinical outcomes and Adverse Events (AEs)

|                                         | <b>Usual Care<br/>(N=506)</b> | <b>Tool<br/>Intervention<br/>(N=495)</b> | <b>P-value</b> |
|-----------------------------------------|-------------------------------|------------------------------------------|----------------|
| Patients Experienced Any AEs, n (%)     | 58 (11.5%)                    | 47 (9.5%)                                | 0.35           |
| Patients Experienced Serious AEs, n (%) | 44 (8.7%)                     | 31 (6.3%)                                | 0.15           |
| Number of Serious AEs, n                | 65                            | 42                                       |                |
| Not-related and Expected, n             | 21                            | 6                                        |                |
| Not-related and Unexpected, n           | 44                            | 36                                       |                |
| Number of Death *                       | 11                            | 8                                        | 0.64           |

\*all death are unrelated and unexpected

Table S3. Anticoagulant decision at 1-month visit\*

| <b>1-month Visit</b>                                                                       | <b>Usual Care<br/>(N=386)</b> | <b>Tool<br/>Intervention<br/>(N=368)</b> | <b>P-value</b> |
|--------------------------------------------------------------------------------------------|-------------------------------|------------------------------------------|----------------|
| Current anticoagulant decision                                                             |                               |                                          | 0.50           |
| I decided to take Warfarin (Coumadin)                                                      | 29 (7.5%)                     | 17 (4.6%)                                |                |
| I decided to take Apixaban or Dabigatran or Edoxaban or Rivaroxaban                        | 324 (83.9%)                   | 321 (87.2%)                              |                |
| I decided to take Aspirin or other antiplatelet agent for the purpose of stroke prevention | 17 (4.4%)                     | 14 (3.8%)                                |                |
| I decided to not take a blood thinner                                                      | 14 (3.6%)                     | 15 (4.1%)                                |                |
| I have not made a decision                                                                 | 2 (0.5%)                      | 1 (0.3%)                                 |                |

\*Data collected on or after protocol v4 1/26/2021

Table S4. Anticoagulant decision at 6-month visit\*

| <b>6-month Visit</b>                                                                       | <b>Usual Care<br/>(N=439)</b> | <b>Tool<br/>Intervention<br/>(N=428)</b> | <b>P-value</b> |
|--------------------------------------------------------------------------------------------|-------------------------------|------------------------------------------|----------------|
| Current anticoagulant decision                                                             |                               |                                          | 0.54           |
| I decided to take Warfarin (Coumadin)                                                      | 27 (6.2%)                     | 21 (4.9%)                                |                |
| I decided to take Apixaban or Dabigatran or Edoxaban or Rivaroxaban                        | 360 (82.0%)                   | 362 (84.6%)                              |                |
| I decided to take Aspirin or other antiplatelet agent for the purpose of stroke prevention | 28 (6.4%)                     | 20 (4.7%)                                |                |
| I decided to not take a blood thinner                                                      | 22 (5.0%)                     | 25 (5.8%)                                |                |
| I have not made a decision                                                                 | 1 (0.2%)                      | 0 (0.0%)                                 |                |
| Missing                                                                                    | 1 (0.2%)                      | 0 (0.0%)                                 |                |

\*Data collected on or after protocol v4 1/26/2021

Table S5. Anticoagulant Medication Adherence at 1-Month Visit\*

| <b>1-Month Visit</b>                            | <b>Usual Care<br/>(N=372)</b> | <b>Tool Intervention<br/>(N=353)</b> | <b>P-value</b> |
|-------------------------------------------------|-------------------------------|--------------------------------------|----------------|
| Current anticoagulant Medication                |                               |                                      | 0.080          |
| Warfarin                                        | 29 (7.8%)                     | 17 (4.8%)                            |                |
| Apixaban                                        | 273 (73.4%)                   | 261 (73.9%)                          |                |
| Dabigatran                                      | 5 (1.3%)                      | 3 (0.8%)                             |                |
| Edoxaban                                        | 0 (0.0%)                      | 0 (0.0%)                             |                |
| Rivaroxaban                                     | 47 (12.6%)                    | 57 (16.1%)                           |                |
| Missing                                         | 18 (4.8%)                     | 15 (4.2%)                            |                |
| Doses of anticoagulant missed in the last week  |                               |                                      | 0.43           |
| 0 doses                                         | 326 (87.6%)                   | 306 (86.7%)                          |                |
| 1 dose                                          | 15 (4.0%)                     | 20 (5.7%)                            |                |
| 2 doses                                         | 8 (2.2%)                      | 7 (2.0%)                             |                |
| 3 doses                                         | 1 (0.3%)                      | 1 (0.3%)                             |                |
| 4 doses                                         | 4 (1.1%)                      | 2 (0.6%)                             |                |
| 5 doses                                         | 0 (0.0%)                      | 1 (0.3%)                             |                |
| 6 doses                                         | 2 (0.5%)                      | 2 (0.6%)                             |                |
| Greater than or equal to 7 doses                | 3 (0.8%)                      | 5 (1.4%)                             |                |
| Missing                                         | 13 (3.5%)                     | 9 (2.5%)                             |                |
| Doses of anticoagulant missed in the last month |                               |                                      | 0.38           |
| 0 doses                                         | 293 (78.8%)                   | 271 (76.8%)                          |                |
| 1-3 dose                                        | 48 (12.9%)                    | 56 (15.9%)                           |                |
| 4-6 doses                                       | 11 (3.0%)                     | 10 (2.8%)                            |                |
| 7-9 doses                                       | 0 (0.0%)                      | 2 (0.6%)                             |                |
| 10 or more doses                                | 7 (1.9%)                      | 5 (1.4%)                             |                |
| Missing                                         | 13 (3.5%)                     | 9 (2.5%)                             |                |

\*Adherence data was collected after protocol amendment v4 on 01/26/2021 and were not available to all the trial participants.

Table S6. Anticoagulant Medication Adherence at 6-Month Visit\*

| <b>6-Month Visit</b>                            | <b>Usual Care<br/>(N=416)</b> | <b>Tool Intervention<br/>(N=403)</b> | <b>P-value</b> |
|-------------------------------------------------|-------------------------------|--------------------------------------|----------------|
| Current anticoagulant                           |                               |                                      | 0.19           |
| Warfarin                                        | 27 (6.5%)                     | 21 (5.2%)                            |                |
| Apixaban                                        | 292 (70.2%)                   | 284 (70.5%)                          |                |
| Dabigatran                                      | 5 (1.2%)                      | 4 (1.0%)                             |                |
| Edoxaban                                        | 1 (0.2%)                      | 0 (0.0%)                             |                |
| Rivaroxaban                                     | 62 (14.9%)                    | 75 (18.6%)                           |                |
| Missing                                         | 29 (7.0%)                     | 19 (4.7%)                            |                |
| Doses of anticoagulant missed in the last week  |                               |                                      | 0.56           |
| 0 doses                                         | 354 (85.1%)                   | 345 (85.6%)                          |                |
| 1 dose                                          | 25 (6.0%)                     | 24 (6.0%)                            |                |
| 2 doses                                         | 8 (1.9%)                      | 7 (1.7%)                             |                |
| 3 doses                                         | 4 (1.0%)                      | 4 (1.0%)                             |                |
| 4 doses                                         | 1 (0.2%)                      | 3 (0.7%)                             |                |
| 5 doses                                         | 0 (0.0%)                      | 0 (0.0%)                             |                |
| 6 doses                                         | 1 (0.2%)                      | 3 (0.7%)                             |                |
| Greater than or equal to 7 doses                | 1 (0.2%)                      | 3 (0.7%)                             |                |
| Missing                                         | 22 (5.3%)                     | 14 (3.5%)                            |                |
| Doses of anticoagulant missed in the last month |                               |                                      | 0.51           |
| 0 doses                                         | 299 (71.9%)                   | 287 (71.2%)                          |                |
| 1-3 dose                                        | 75 (18.0%)                    | 80 (19.9%)                           |                |
| 4-6 doses                                       | 11 (2.6%)                     | 17 (4.2%)                            |                |
| 7-9 doses                                       | 6 (1.4%)                      | 1 (0.2%)                             |                |
| 10 or more doses                                | 3 (0.7%)                      | 4 (1.0%)                             |                |
| Missing                                         | 22 (5.3%)                     | 14 (3.5%)                            |                |

\* Adherence data was collected after protocol amendment v4 on 01/26/2021 and were not available to all the trial participants.

Table S7: Analysis of Primary Endpoint Correction for Missing Data

|                                                                          | <b>Usual Care<br/>(N=506)</b> | <b>Tool<br/>Intervention<br/>(N=495)</b> | <b>P-value</b> |
|--------------------------------------------------------------------------|-------------------------------|------------------------------------------|----------------|
| WMW U-test with Inverse Probability Weighting                            |                               |                                          | 0.012          |
| Imputation by Median of Opposite Arm                                     | 14.1 (0.0 - 25.0)             | 12.5 (0.0 - 25.0)                        | 0.018          |
| WMW U-test with All Patients and using ties for all missing observations |                               |                                          | 0.0072         |
